# Supplementary material for: An ROS-responsive antioxidant hydrogel with immunomodulatory activity for promoting diabetic wound healing
Source: Royal Society of Chemistry journal article supplement (doi:10.1039/d6bm00018e), 2026-01-01
Supplement: d6bm00018e1.pdf [file d6bm00018e1.pdf]

## Supporting Information for

# ROS-Responsive Antioxidant Hydrogel with Immunomodulatory Activity for Promoting Diabetic Wound Healing

*Yurao Liu<sup>a</sup>, Qianqian Yang<sup>a</sup>, Ling Zhang<sup>a</sup>, Qiyue Lu<sup>b</sup>, Yuhang Li<sup>b</sup>, Haisong Zhang<sup>c</sup>, Chunfang Zhang<sup>a\*</sup>, Pingli Wu<sup>b\*</sup>*

<sup>a</sup> College of Chemistry and Materials Science, Hebei University, Baoding 071002, China

<sup>b</sup> Key Laboratory of Flexible Optoelectronic Materials and Technology (Ministry of Education), School of Optoelectronic Materials & Technology, Jiangnan University, Wuhan 430056, China

<sup>c</sup> Hebei Provincial Key Laboratory of Skeletal Metabolic Physiology of Chronic Kidney Disease, Affiliated Hospital of Hebei University, Baoding 071000, China

\*Correspondence address. E-mail: Pingli Wu, Email: wupl0520@jhu.edu.cn;  
Chunfang Zhang, Email: zhangcf@hbu.edu.cn

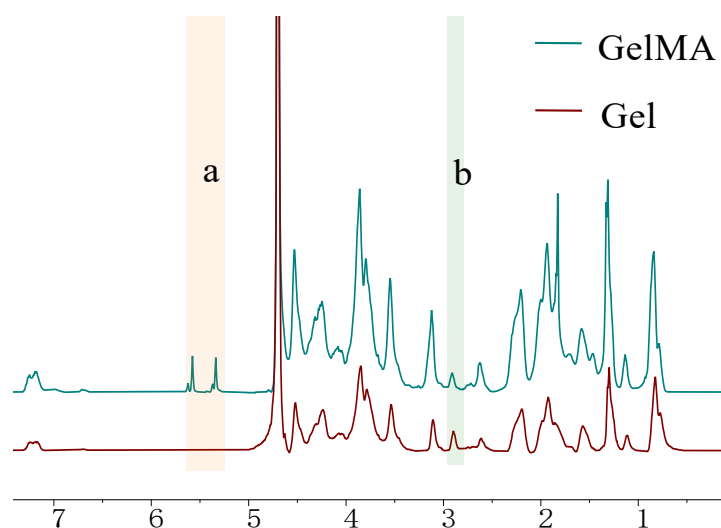

Figure S1.  $^1\text{H}$  NMR spectrum of MA on gelatin.

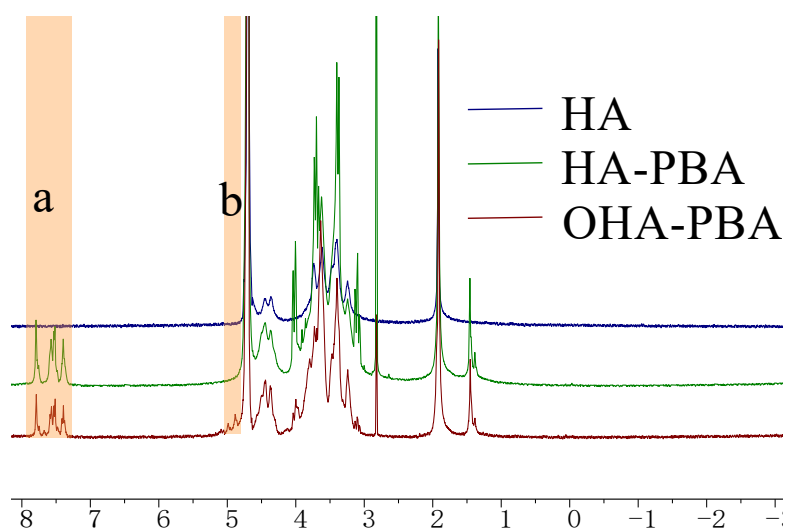

Figure S2.  $^1\text{H}$  NMR spectrum of OHA-PBA.

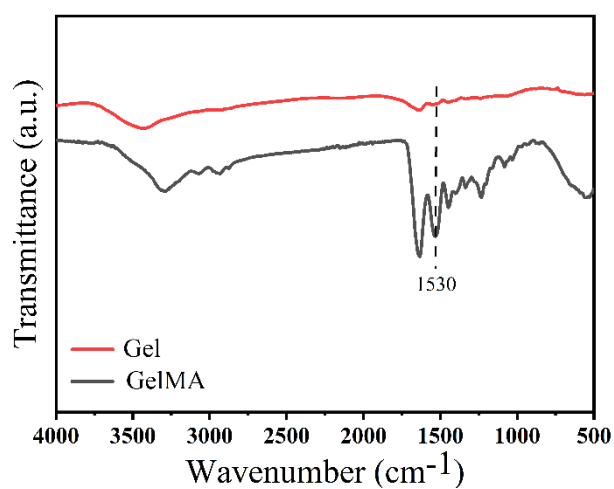

Figure S3. FTIR spectrum of GelMA.

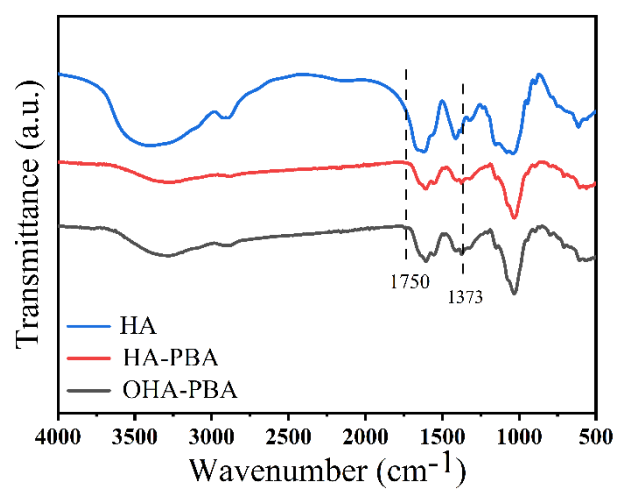

Figure S4. FTIR spectrum of OHA-PBA.

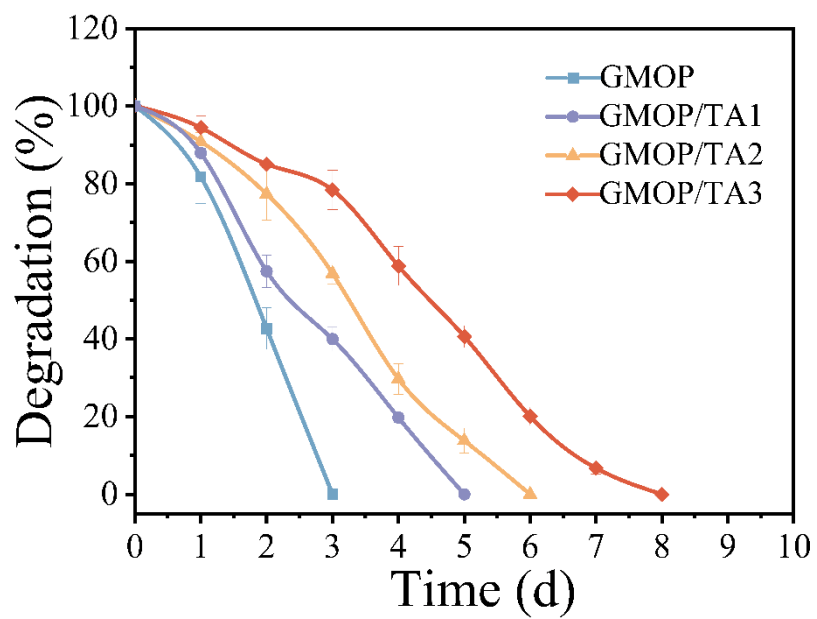

Figure S5. Degradation of GMOP Hydrogels.

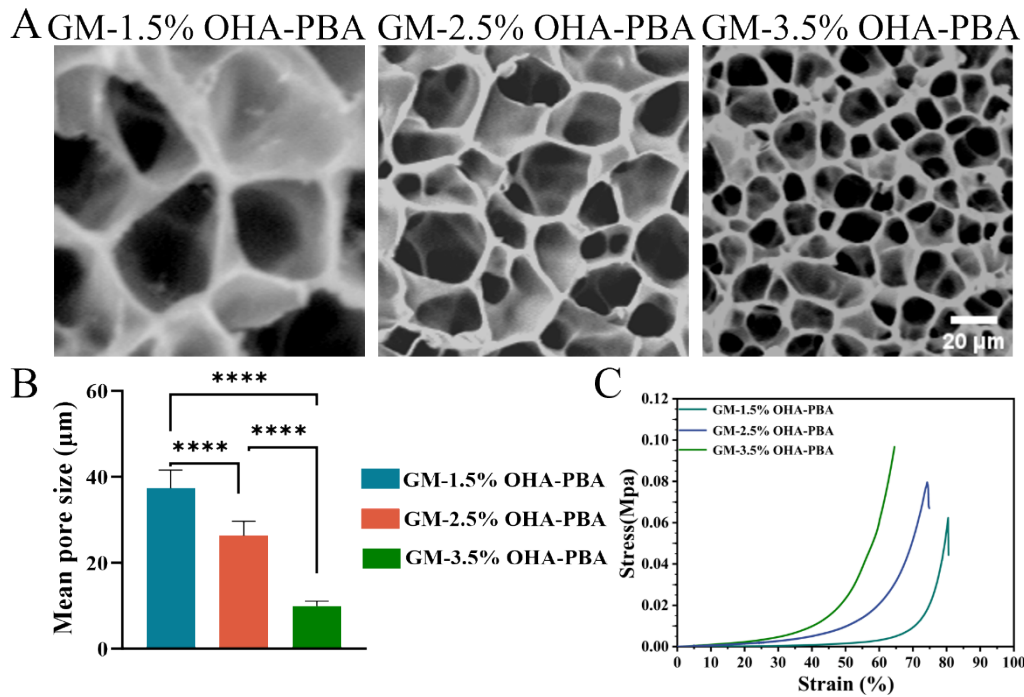

Figure S6. Performance of hydrogels with different ratios. (A) SEM images of OHP after lyophilization at different ratios; (B) pore size analysis of each group; (C) Compressive properties of hydrogels.

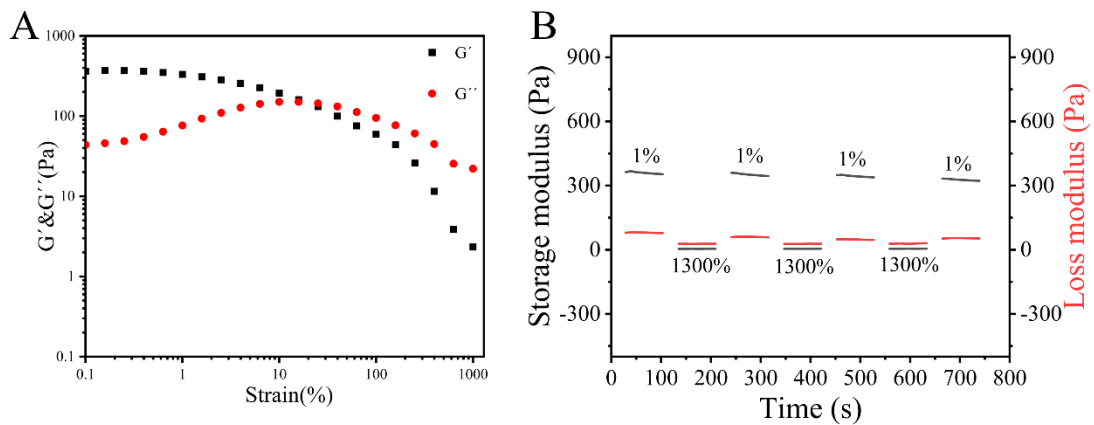

Figure S7. Rheological properties of GMOP/TA hydrogels. (A) Oscillatory strain amplitude sweep; (B) Time sweep tests. The viscoelastic properties of the material were measured using a TA/Waters HR-3 rheometer at 25  $^{\circ}\text{C}$  with a parallel-plate geometry in oscillation mode. Dynamic strain amplitude sweeps were performed from 0.1% to 1000% strain at a frequency of 10 rad/s and a temperature of 25  $^{\circ}\text{C}$ . Time-sweep tests were carried out at 25  $^{\circ}\text{C}$  under alternating strain conditions: each cycle consisted of 80 s at low strain (1%) followed by 80 s at high strain (1300%), and this cycle was repeated three times.
